# Supplementary material
Source: PubMed Central journal article supplement (PMC2808368)
Supplement: emboj2009319s2.pdf [file emboj2009319s2.pdf]

**A**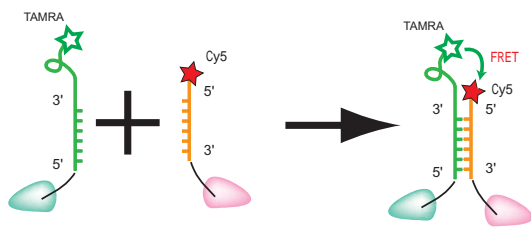**B**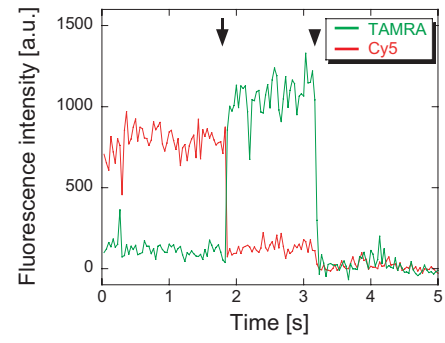**C**

AMP-PNP

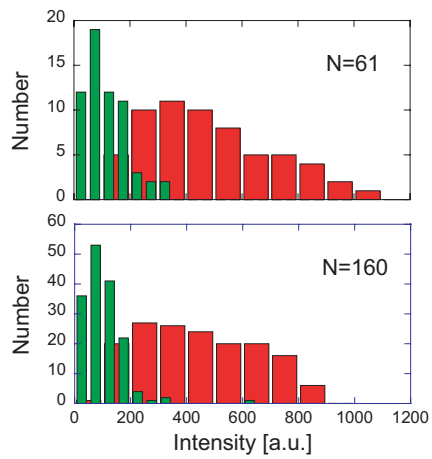

ATP

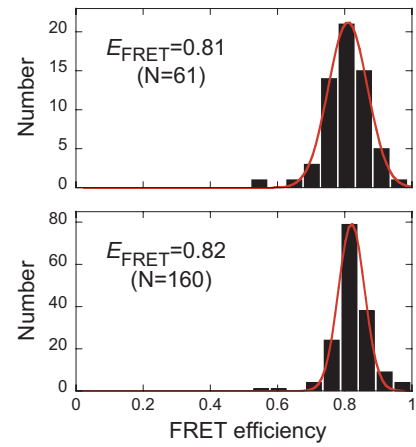

A

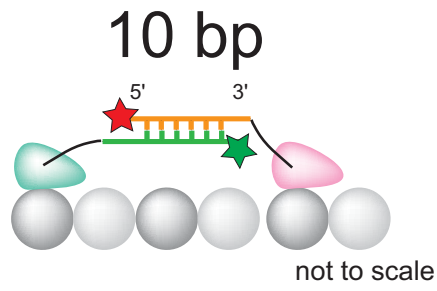

B

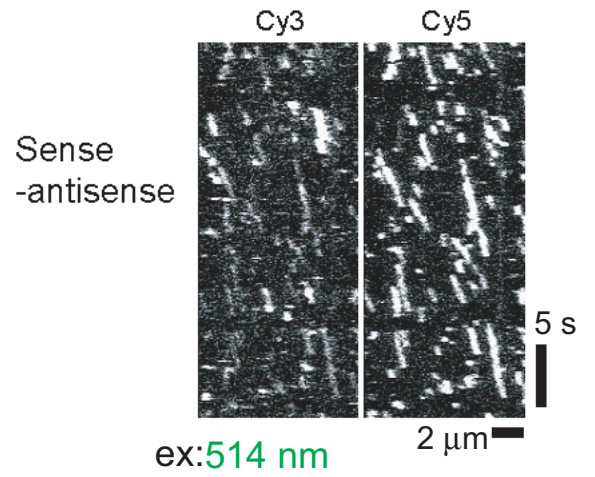

C

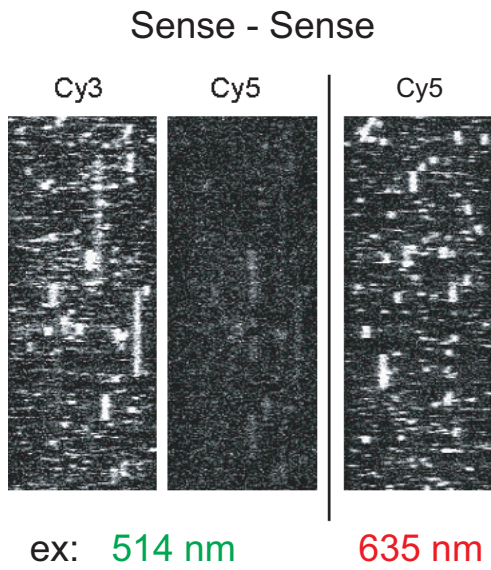

D

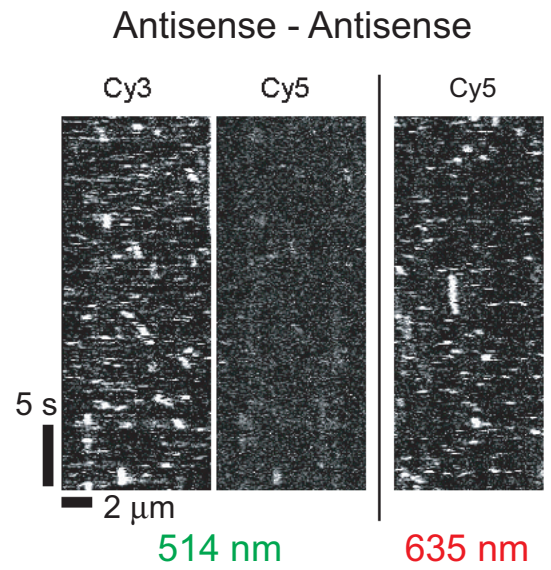

A

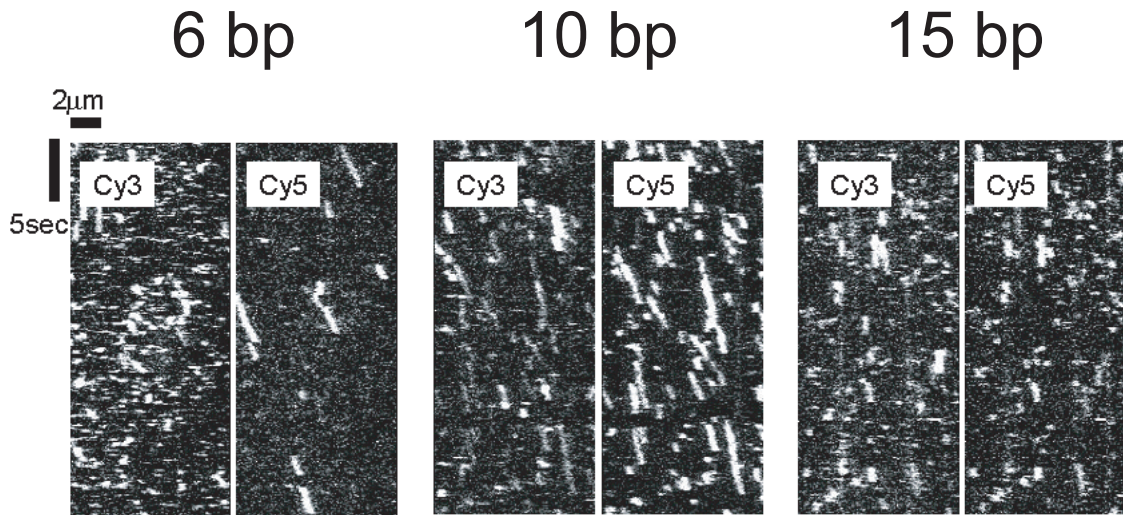

B

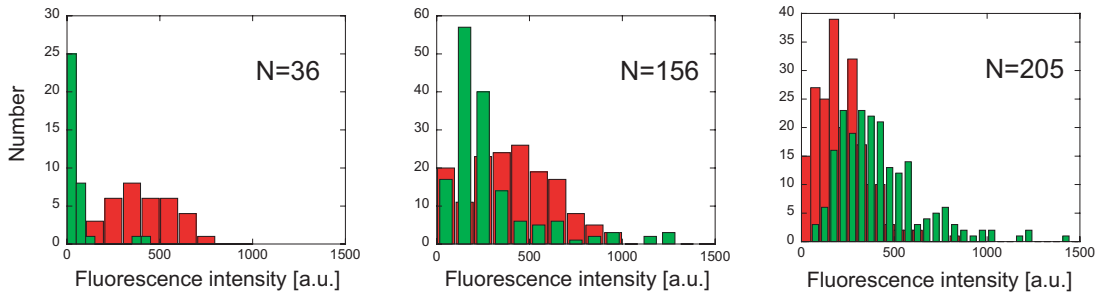

C

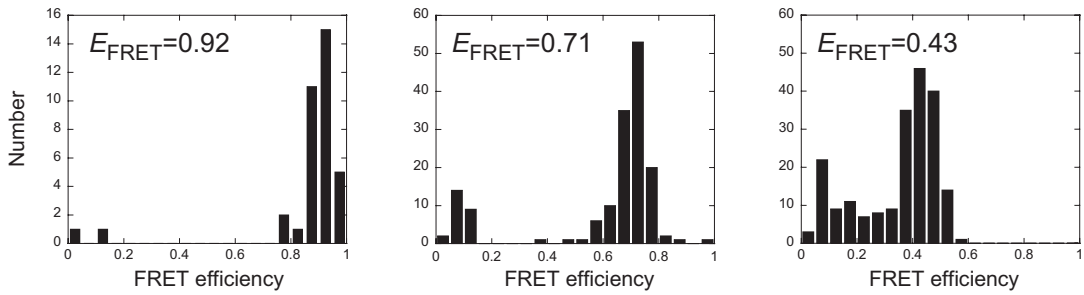

D

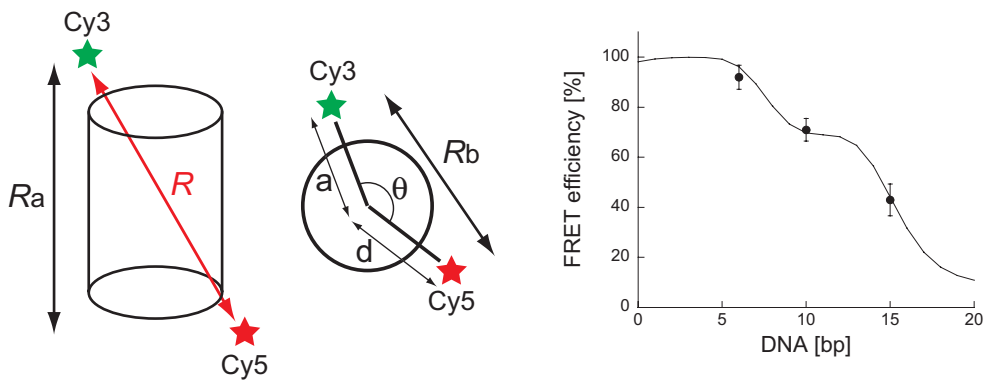

A

333

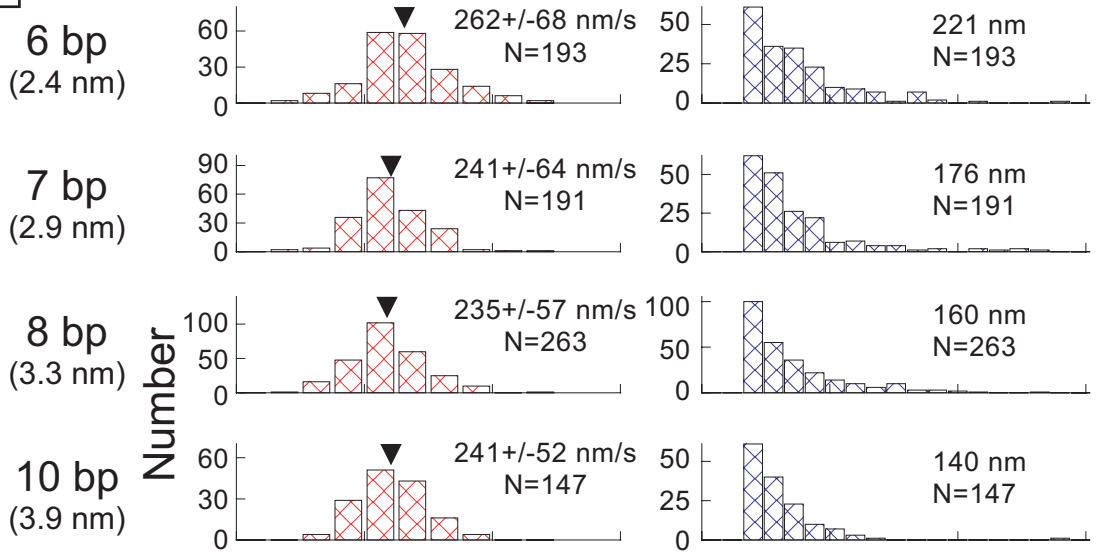

328

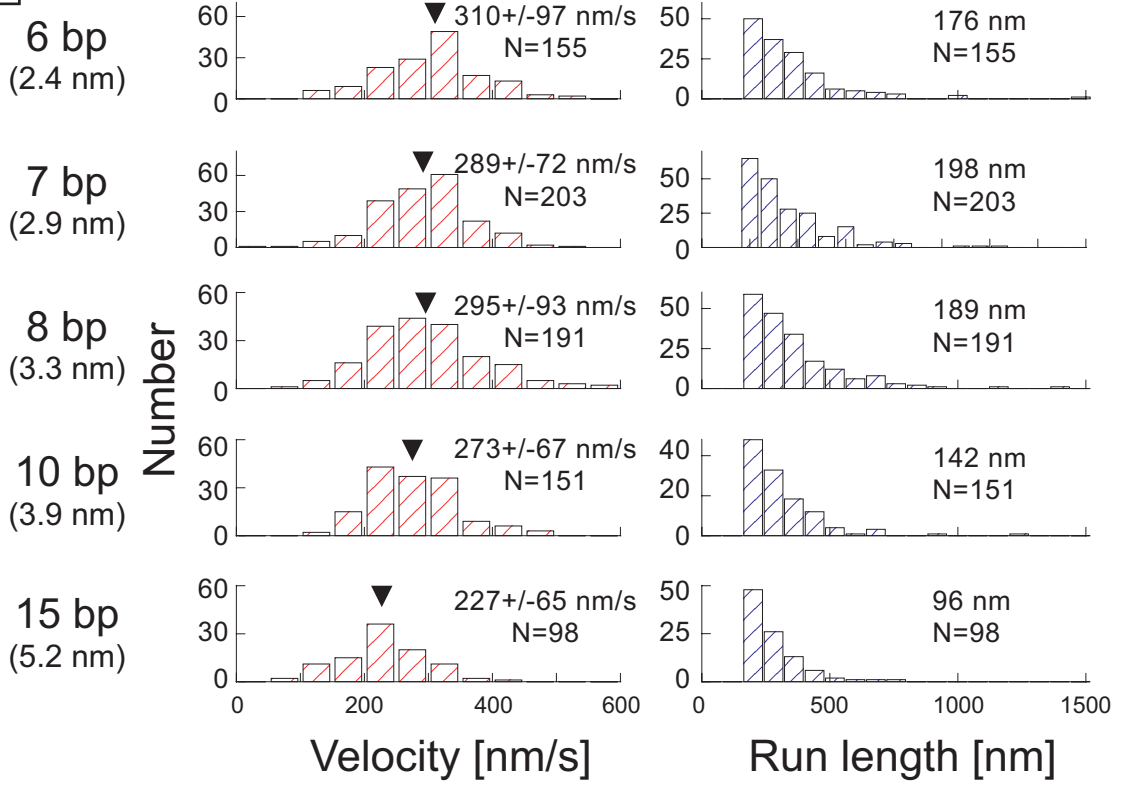

B

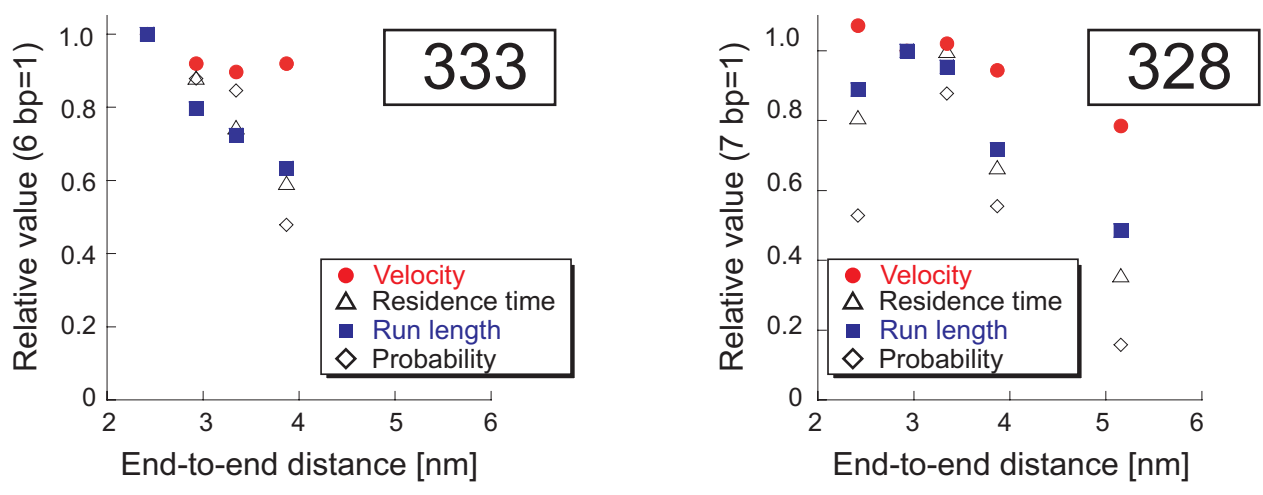

A

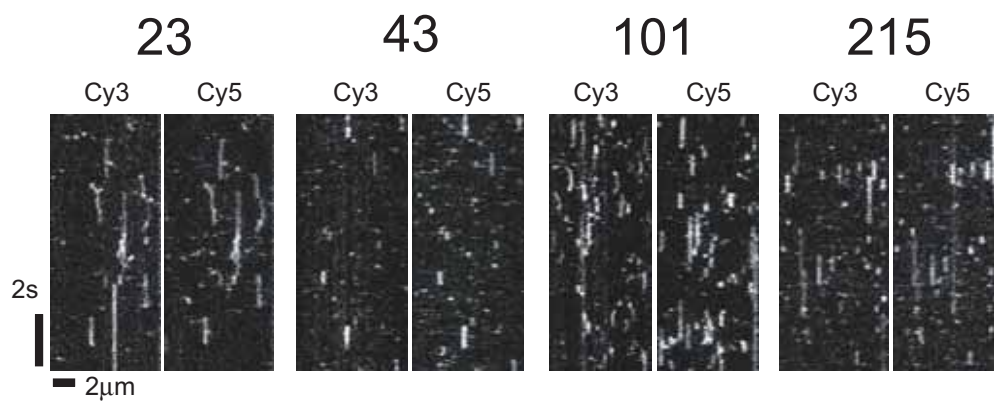

B

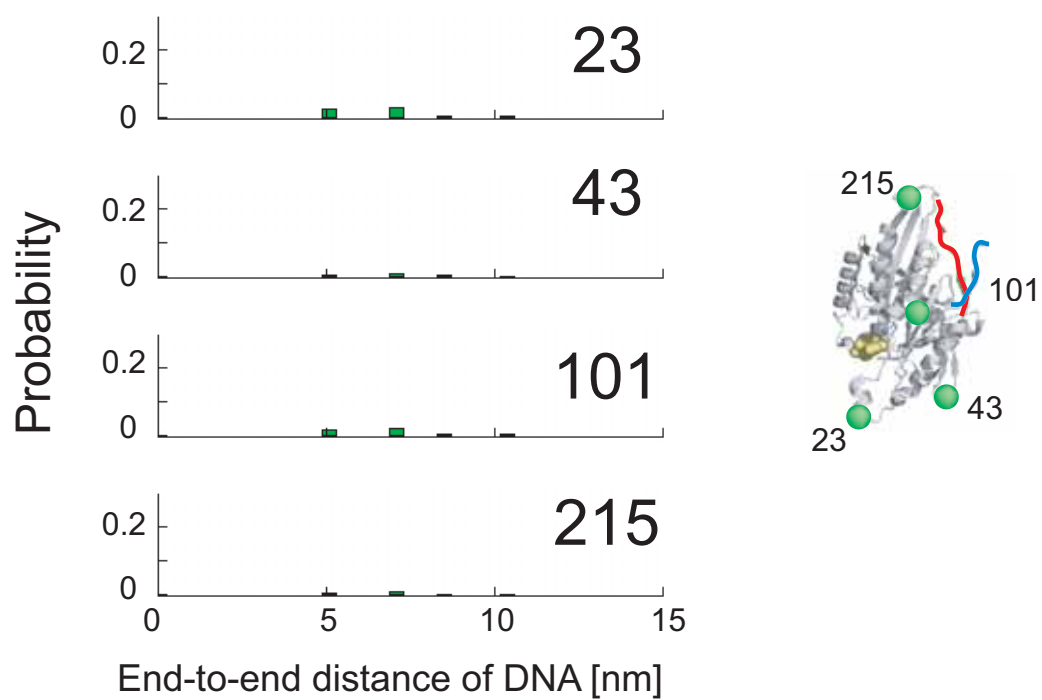

A

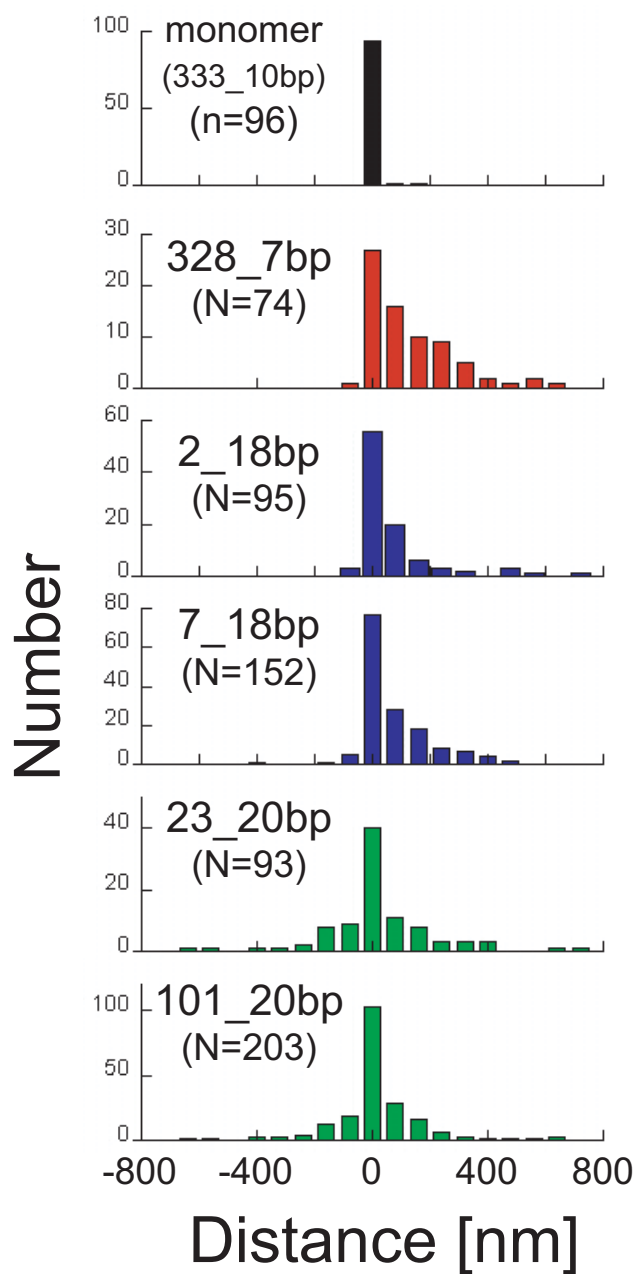

B

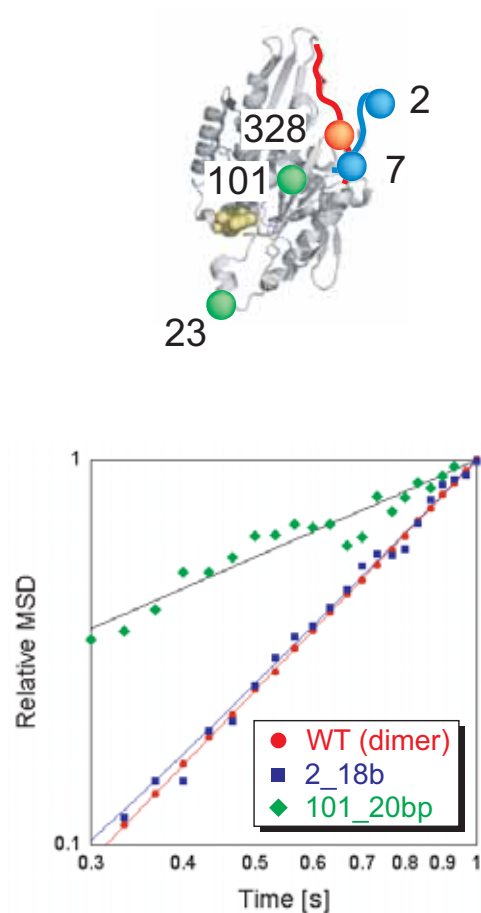

**A**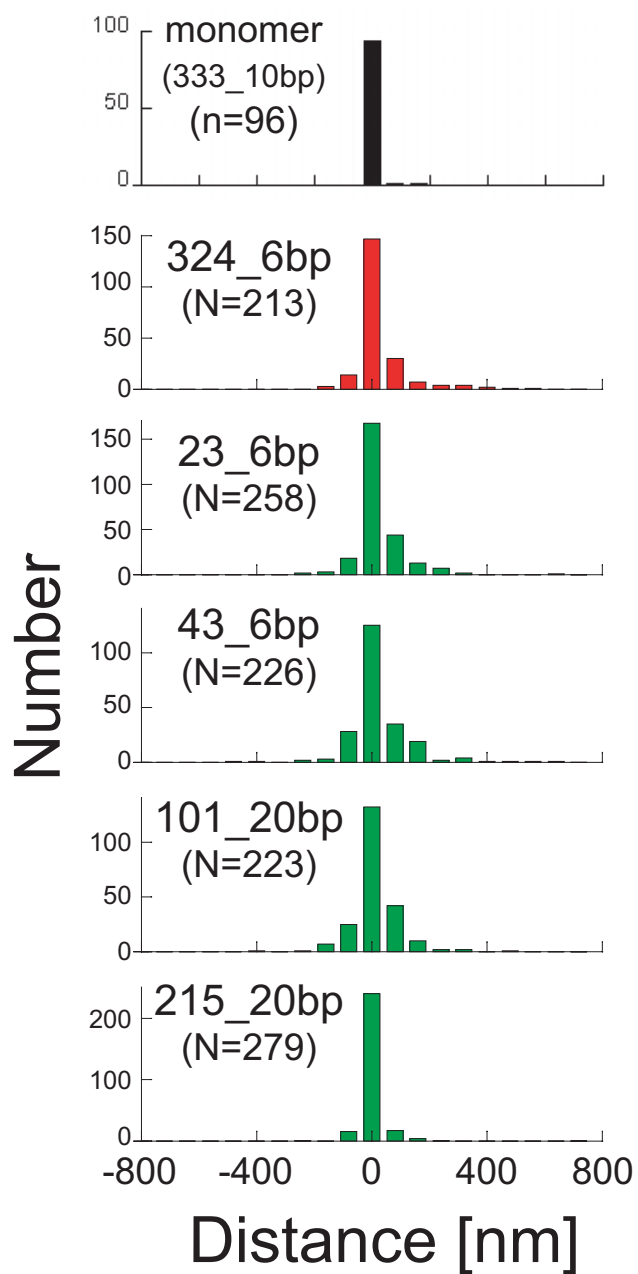**B**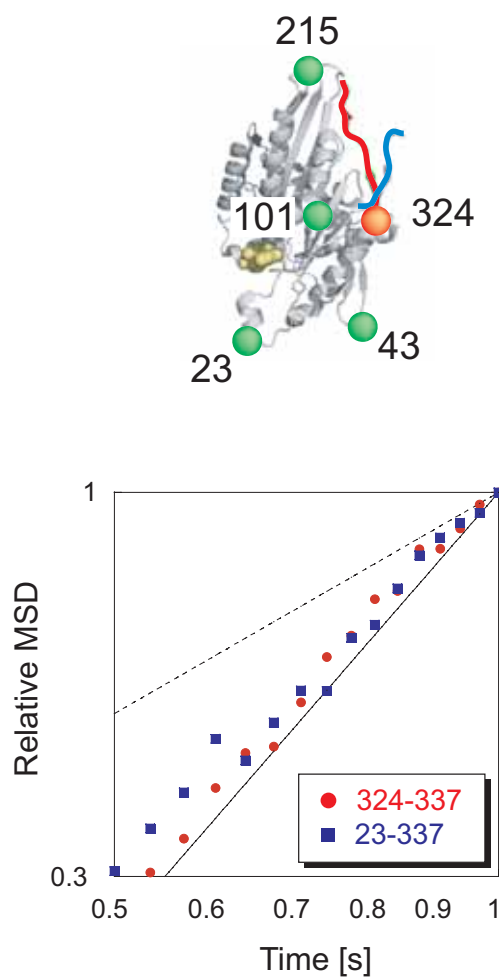

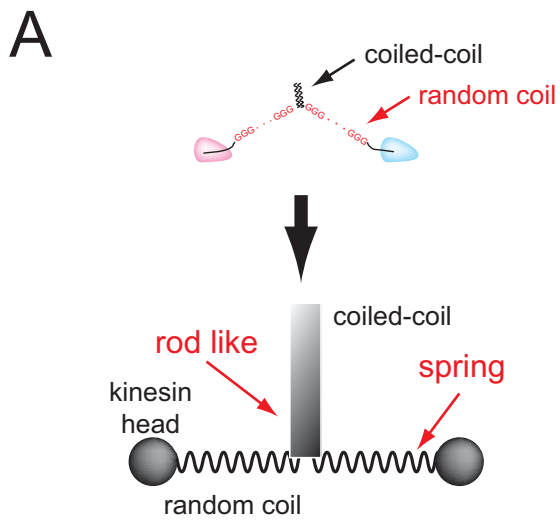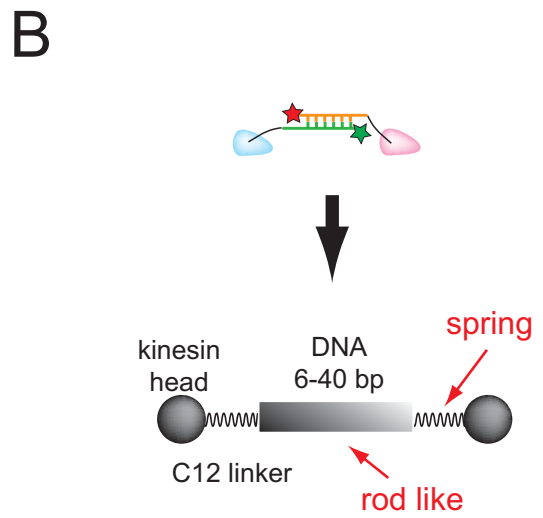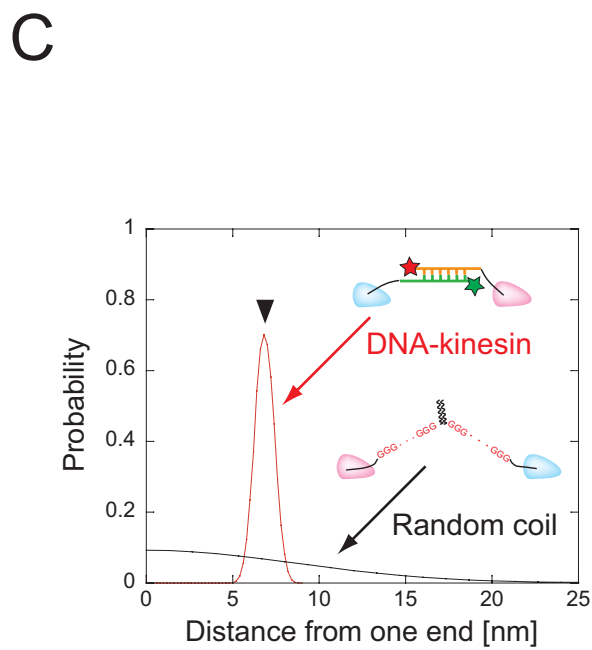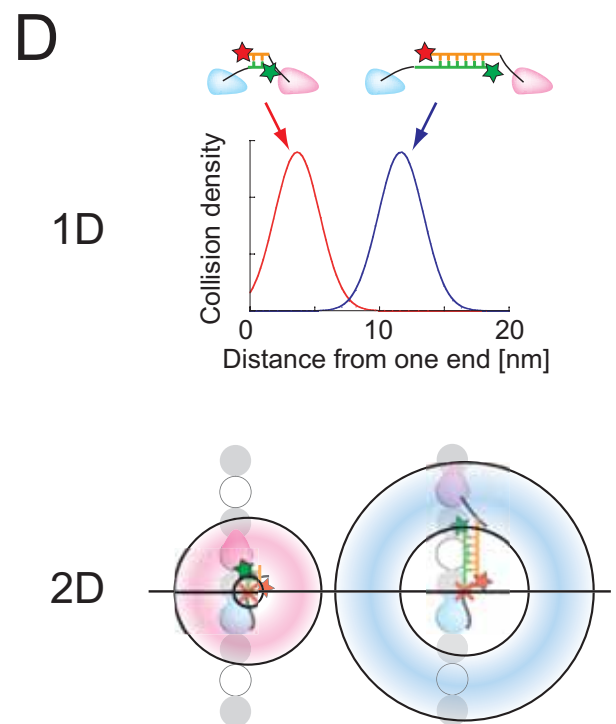



A

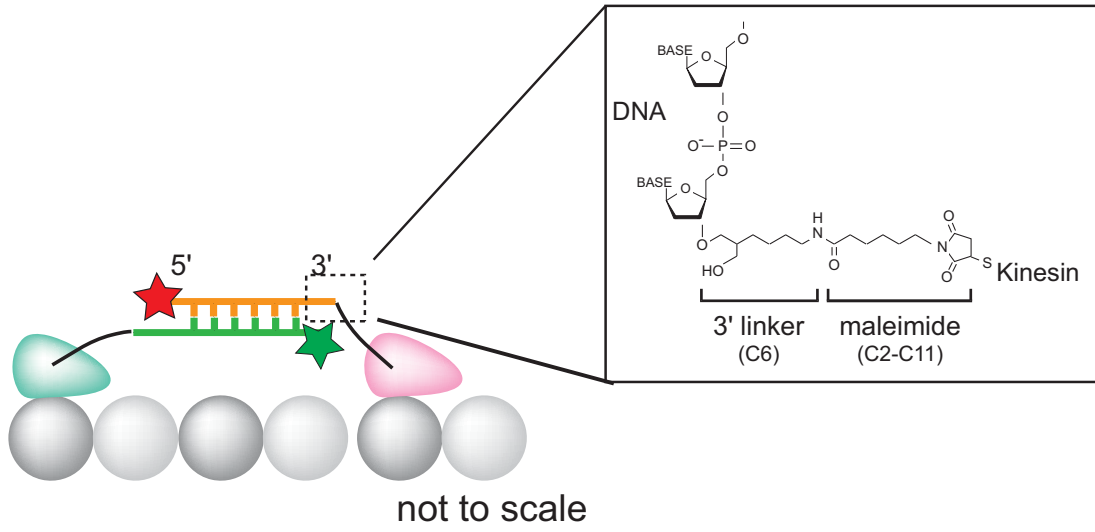

B

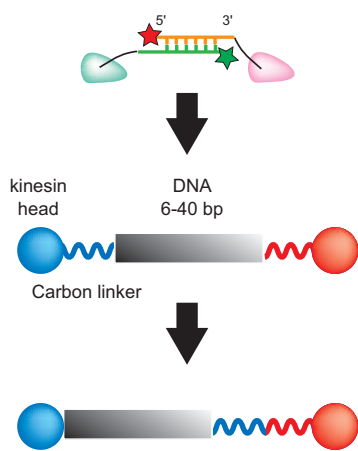

C

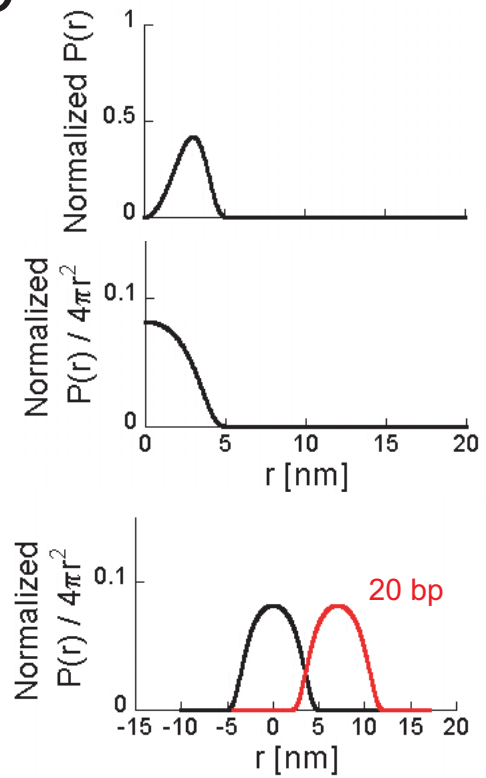

A

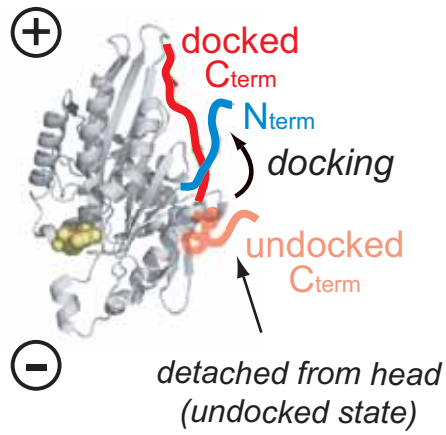

B

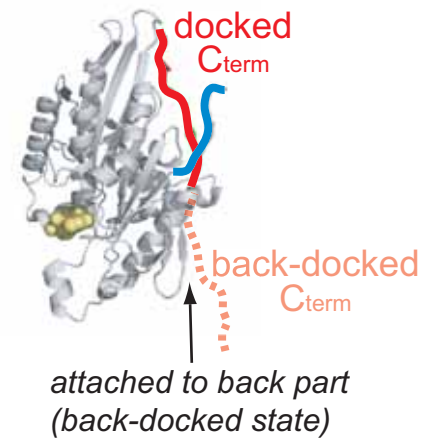

C

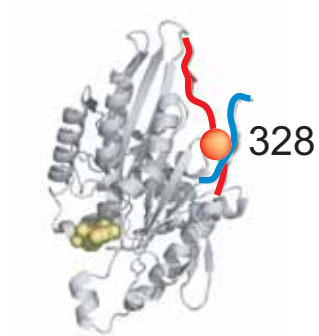

D

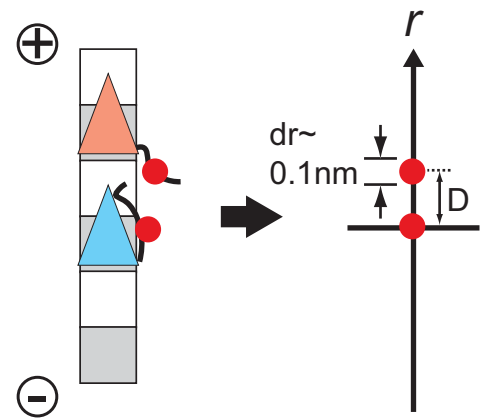

E

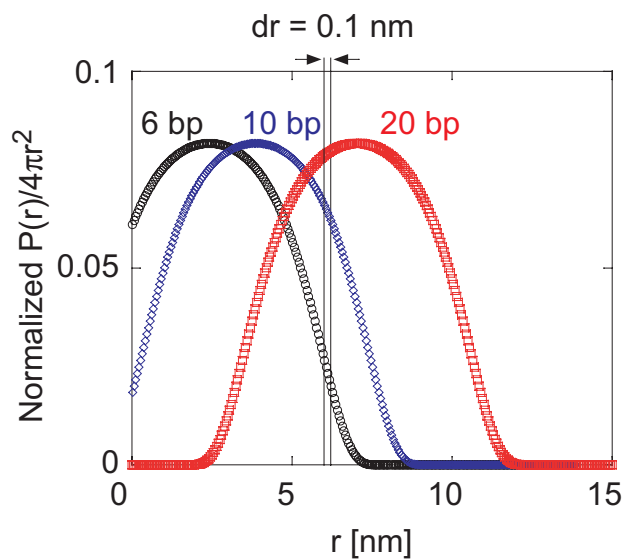

F

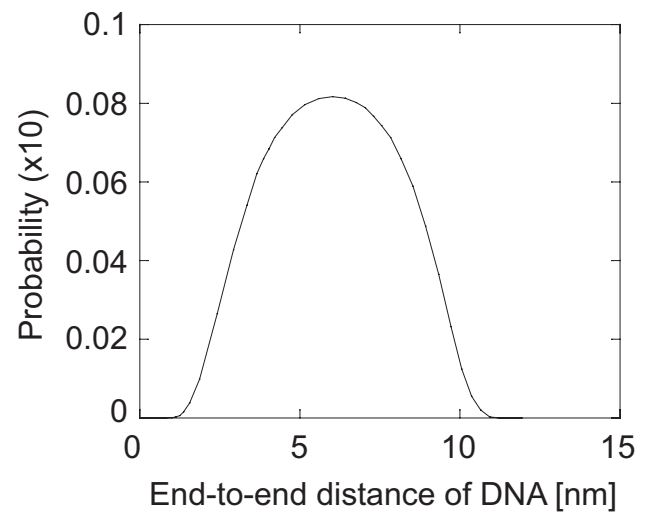

**A**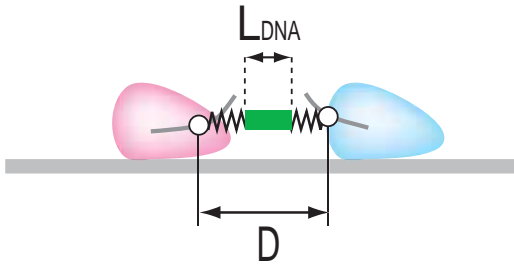**B**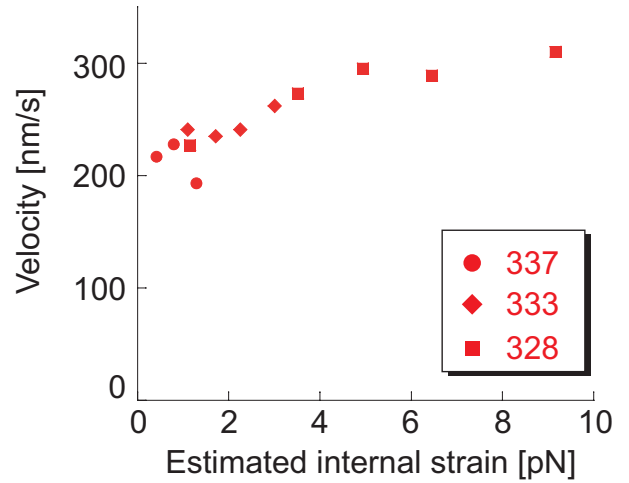**C**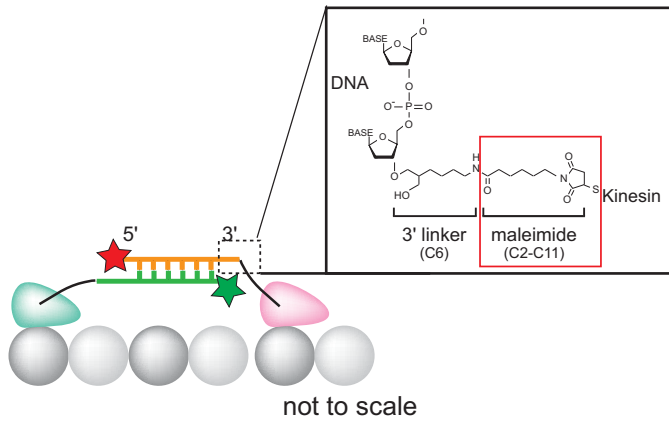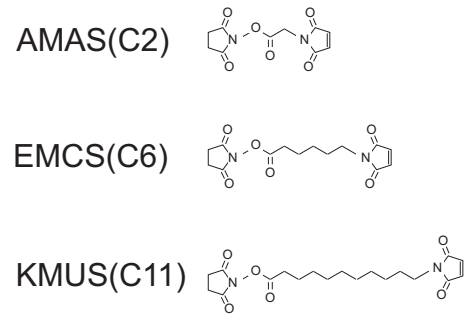**D**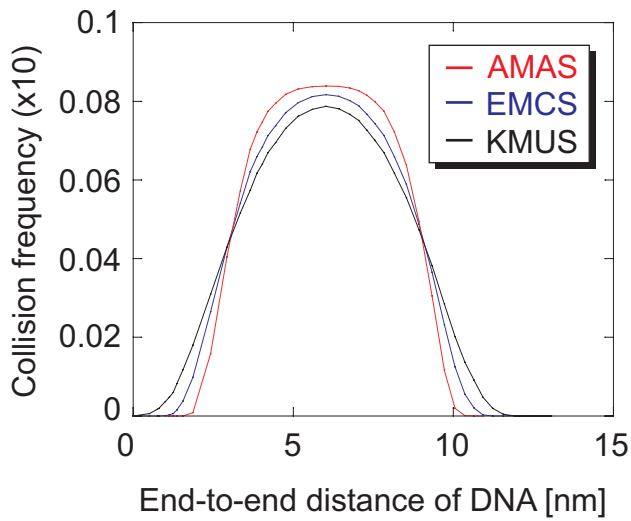**E**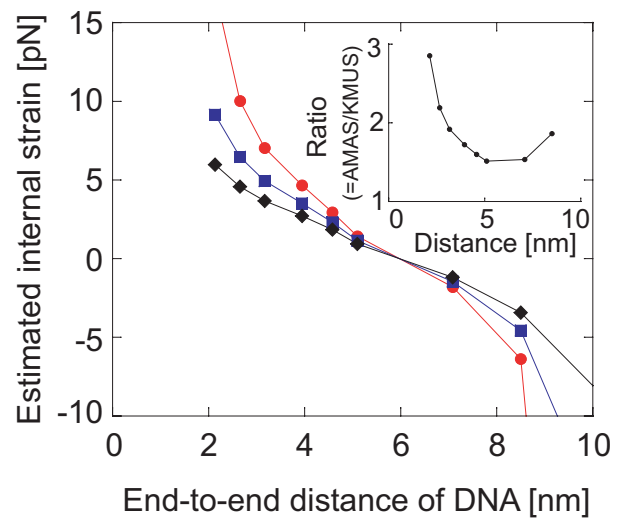

A

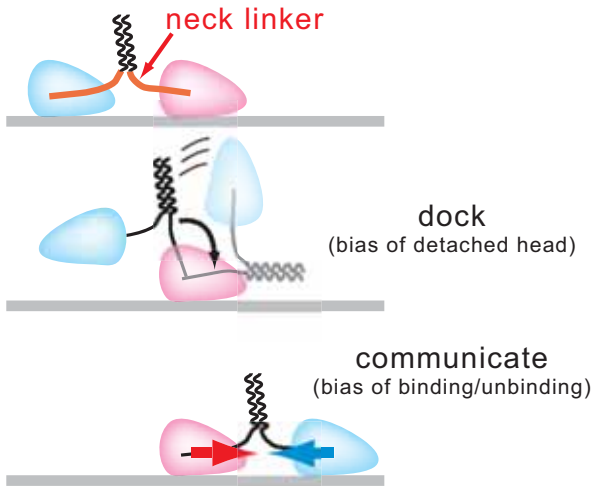

B

*bias by docking*

|   |                   |     |
|---|-------------------|-----|
|   | ○                 | ×   |
| ○ | C <sub>term</sub> | — * |
| × | N <sub>term</sub> | Mid |

C

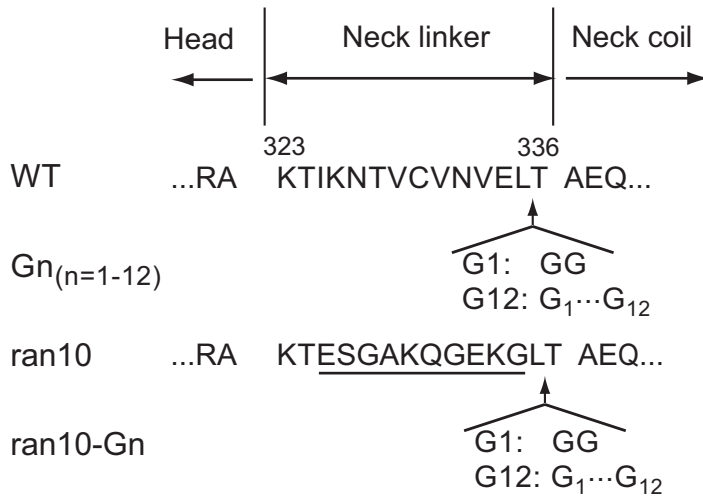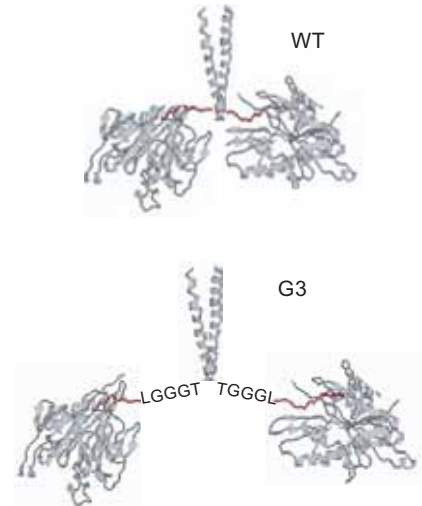

D

|        |       |            |
|--------|-------|------------|
| K324   | ...RA | KC         |
| K325   | ...RA | KTC        |
| K324G2 | ...RA | KTGGC      |
| K324G7 | ...RA | KTGGGGGGGC |

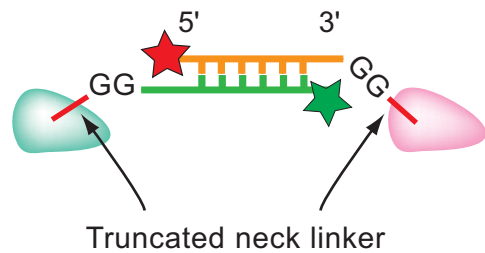

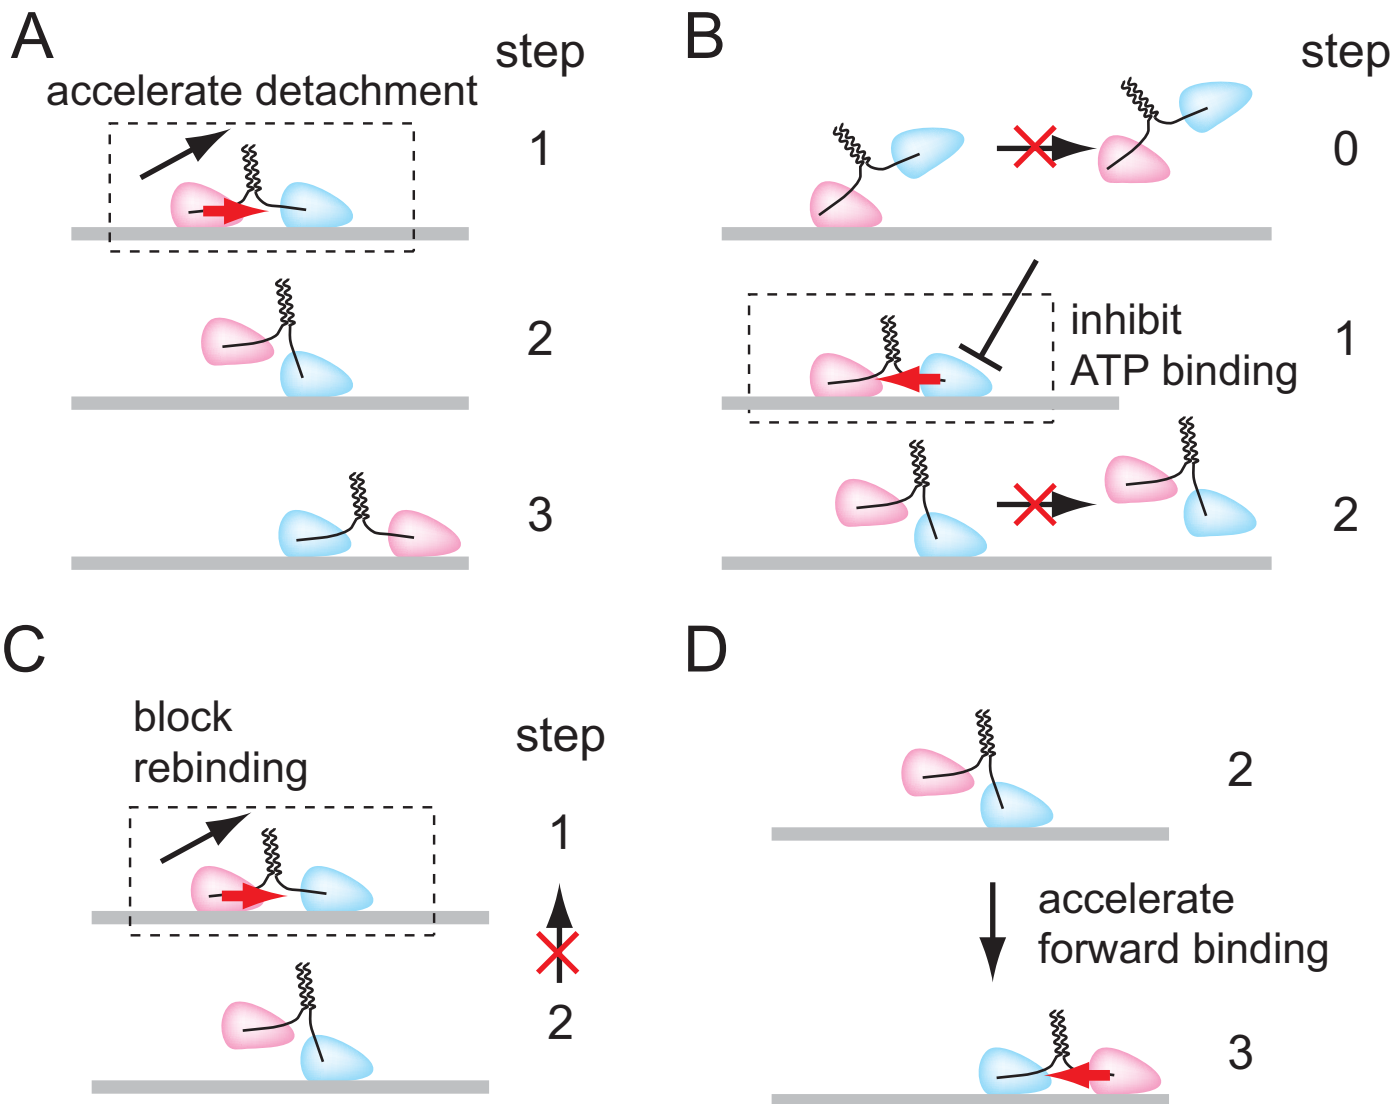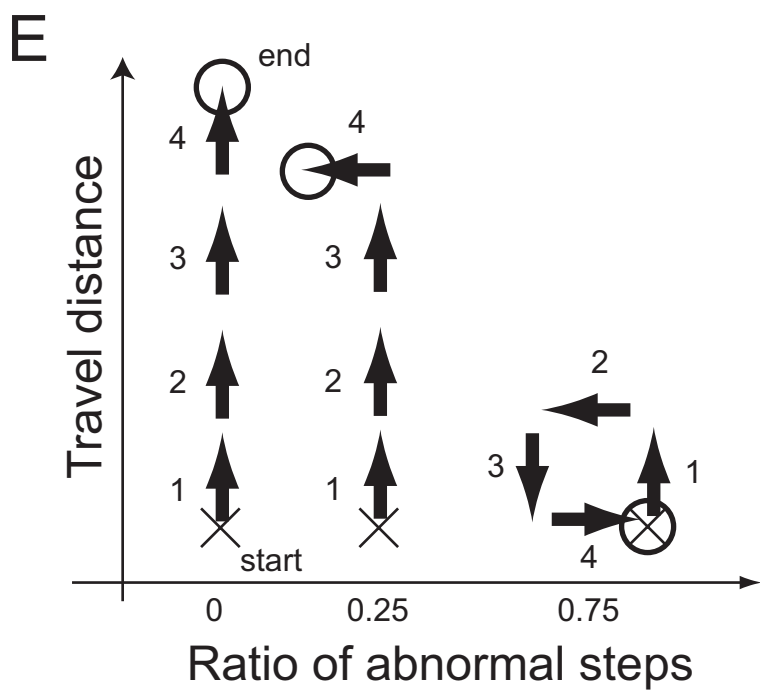

|       | name   | [bp]                                     | sequence                                    |
|-------|--------|------------------------------------------|---------------------------------------------|
| A     | K20T13 | 33                                       | GGATGGT <u>GGTACCCTT</u> CCCGTTTTTTTTTTTTTT |
| B     | GC6_S  | 6                                        | CCGCCC                                      |
|       | GC7_S  | 7                                        | CCGCCCC                                     |
|       | GC8_S  | 8                                        | GGGGCGGG                                    |
|       | GC10_S | 10                                       | CCCGTCCCCC                                  |
|       | K13_S  | 13                                       | CGTGGTACCCTCC                               |
|       | K15_S  | 15                                       | TCGTGGTACCCTTCG                             |
|       | K16_S  | 16                                       | ATGGTGGTACCCTTCC                            |
|       | K18_S  | 18                                       | GATGGTGGTACCCTTCCC                          |
|       | K20_S  | 20                                       | GGATGGTGGTACCCTTCCCG                        |
|       | K22_S  | 22                                       | ATGGATGGTGGTACCCTTCTCG                      |
|       | K25_S  | 25                                       | CGGATGGATGGTGGTACCCTTCTCG                   |
|       | K30_S  | 30                                       | GAGCCGGATGGTGGTACCCTTCGCG TAGAG             |
|       | K35_S  | 35                                       | GGAGAGCCGGATGGTGGTACCCTTCGCGTAGAGAG         |
| K40_S | 40     | AGAGAGAGCCGGATGGTGGTACCCTTCGCGTAGAGAGAGA |                                             |
| C     | K8_S   | 8                                        | <u>CGGTACCC</u>                             |
|       | K10_S  | 10                                       | TGGGTACCGC                                  |
